# Supplementary material for: JMJD6 orchestrates a transcriptional program in favor of endocrine resistance in ER+ breast cancer cells
Source: Front Endocrinol (Lausanne). 2022 Nov 7;13:1028616. doi: 10.3389/fendo.2022.1028616 (PMC9678079; doi:10.3389/fendo.2022.1028616)
Supplement: Supplementary Table 1 — Primers used for qRT-PCR analysis. [file Table_1.xlsx]

## Sheet: Sheet1
Primers sequences for qRT-PCR of mRNA
Gene Name	Forward (5'-3')	Reverse (5'-3')
JMJD6	GGTTGACCTTCAGGAGTCCAC	TGCGCTCTTTGCTGACACAGTC
HOTAIR	GGTAGAAAAAGCAACCACGAAGC	ACATAAACCTCTGTCTGTGAGTGCC
MYC	AATGAAAAGGCCCCCAAGGTAGTTATCC	GTCGTTTCCGCAACAAGTCCTCTT
AURKA	GCAACCAGTGTACCTCATCCTG	AAGTCTTCCAAAGCCCACTGCC
AURKB	GGAGTGCTTTGCTATGAGCTGC	GAGCAGTTTGGAGATGAGGTCC
ESR1	GCAGGGAGAGGAGTTTGT	GACTTCAGGGTGCTGGAC
FOXC1	CTCACCTCGTGGTACCTGAA	GGAAGGCCATTTGACAGCTA
GREB1	ATTCCAGCACCCAAAATCTG	GTGCCTCCGTGTCTAGCTTC
TFF1	GTTGGGAGCTAGGATGGTCA	AGTGAGTGGCGGATTTGAAC
NRIP1	CGGAAGAGGCTGTCTGATTC	AGGGCATATCCTTGCTCCTT
SMAD7	TCCTGCTGTGCAAAGTGTTC	AAATCCATCGGGTATCTGGA
RET	GTCCTCTTGCTCCACTTCAACG	CCTGGCAGTTTTCCACACAGAC
β-ACTIN	GAGCACAGAGCCTCGCCTTT	TCATCATCCATGGTGAGCTGG
