# Supplementary material for: JMJD6 orchestrates a transcriptional program in favor of endocrine resistance in ER+ breast cancer cells
Source: Front Endocrinol (Lausanne). 2022 Nov 7;13:1028616. doi: 10.3389/fendo.2022.1028616 (PMC9678079; doi:10.3389/fendo.2022.1028616)
Supplement: Supplementary Table 2 — JOE set genes (n=1131), Fold Change (FC) = 2, adjusted p-value < 0.05. [file Table_2.xlsx]

## Sheet: 2-fold change cut off_JOE SET
GeneID	Gene name	logFC
ENSG00000229807.13	XIST	6.85381
ENSG00000137868.19	STRA6	4.24134
ENSG00000215182.8	MUC5AC	4.22652
ENSG00000160862.13	AZGP1	4.18395
ENSG00000120875.9	DUSP4	3.52581
ENSG00000121413.13	ZSCAN18	3.51832
ENSG00000086548.9	CEACAM6	3.50283
ENSG00000111319.13	SCNN1A	3.45682
ENSG00000147614.4	ATP6V0D2	3.45191
ENSG00000070495.15	JMJD6	3.44301
ENSG00000169418.10	NPR1	3.33968
ENSG00000285094.1	AP000439.5	3.30732
ENSG00000173175.15	ADCY5	3.21284
ENSG00000240216.7	CPHL1P	3.18393
ENSG00000198797.7	BRINP2	3.1716
ENSG00000178372.8	CALML5	3.16898
ENSG00000205488.9	CALML3-AS1	3.15419
ENSG00000167755.15	KLK6	3.14328
ENSG00000146409.12	SLC18B1	3.04759
ENSG00000163520.14	FBLN2	3.00202
ENSG00000287566.1		2.95605
ENSG00000119915.5	ELOVL3	2.93574
ENSG00000244468.1	AC093001.1	2.93008
ENSG00000169851.15	PCDH7	2.8688
ENSG00000163993.7	S100P	2.86016
ENSG00000082074.19	FYB1	2.77285
ENSG00000138356.14	AOX1	2.72319
ENSG00000262370.6	AC108134.3	2.71544
ENSG00000261812.6	TUBB8P7	2.68674
ENSG00000070882.13	OSBPL3	2.6848
ENSG00000197992.7	CLEC9A	2.64128
ENSG00000164743.5	C8orf48	2.6382
ENSG00000198440.9	ZNF583	2.62524
ENSG00000136999.5	NOV	2.60282
ENSG00000173467.9	AGR3	2.57869
ENSG00000163563.8	MNDA	2.56616
ENSG00000120280.6	CXorf21	2.52673
ENSG00000165300.8	SLITRK5	2.52294
ENSG00000172578.12	KLHL6	2.51827
ENSG00000186818.12	LILRB4	2.50581
ENSG00000043462.13	LCP2	2.48379
ENSG00000205572.10	SERF1B	2.48309
ENSG00000110852.5	CLEC2B	2.47973
ENSG00000150676.13	CCDC83	2.45906
ENSG00000138722.10	MMRN1	2.45834
ENSG00000281181.1	FP236383.3	2.45532
ENSG00000145287.11	PLAC8	2.45157
ENSG00000083844.10	ZNF264	2.44733
ENSG00000172322.14	CLEC12A	2.4369
ENSG00000205744.10	DENND1C	2.4324
ENSG00000137752.24	CASP1	2.41312
ENSG00000158869.11	FCER1G	2.41281
ENSG00000060982.15	BCAT1	2.38631
ENSG00000111348.9	ARHGDIB	2.38611
ENSG00000229314.6	ORM1	2.37843
ENSG00000171724.3	VAT1L	2.36419
ENSG00000182568.17	SATB1	2.34897
ENSG00000178199.14	ZC3H12D	2.34533
ENSG00000112319.20	EYA4	2.34447
ENSG00000261371.6	PECAM1	2.33462
ENSG00000081237.20	PTPRC	2.31719
ENSG00000110848.8	CD69	2.31224
ENSG00000165071.15	TMEM71	2.30565
ENSG00000147065.17	MSN	2.30454
ENSG00000204472.13	AIF1	2.28799
ENSG00000081189.16	MEF2C	2.28482
ENSG00000149516.14	MS4A3	2.2794
ENSG00000126860.12	EVI2A	2.27217
ENSG00000232400.1	RAD17P1	2.2696
ENSG00000074527.13	NTN4	2.26778
ENSG00000136250.12	AOAH	2.26766
ENSG00000145569.6	FAM105A	2.26429
ENSG00000110077.15	MS4A6A	2.25475
ENSG00000104043.15	ATP8B4	2.23991
ENSG00000241743.4	XACT	2.23797
ENSG00000152580.9	IGSF10	2.23516
ENSG00000166927.13	MS4A7	2.23458
ENSG00000115232.14	ITGA4	2.22118
ENSG00000183569.18	SERHL2	2.22001
ENSG00000174776.12	WDR49	2.21273
ENSG00000101445.10	PPP1R16B	2.21015
ENSG00000100448.4	CTSG	2.20673
ENSG00000086730.17	LAT2	2.1885
ENSG00000258227.7	CLEC5A	2.18737
ENSG00000122862.5	SRGN	2.18691
ENSG00000125538.12	IL1B	2.18611
ENSG00000130755.13	GMFG	2.18231
ENSG00000015568.13	RGPD5	2.18091
ENSG00000138685.17	FGF2	2.17269
ENSG00000123338.13	NCKAP1L	2.16886
ENSG00000082397.18	EPB41L3	2.165
ENSG00000151062.15	CACNA2D4	2.16387
ENSG00000104972.16	LILRB1	2.1624
ENSG00000225231.2	LINC02470	2.16169
ENSG00000164690.8	SHH	2.1574
ENSG00000197044.11	ZNF441	2.15606
ENSG00000136167.15	LCP1	2.15411
ENSG00000150681.10	RGS18	2.15324
ENSG00000166920.13	C15orf48	2.14964
ENSG00000067646.12	ZFY	2.14606
ENSG00000129824.16	RPS4Y1	2.1459
ENSG00000169385.3	RNASE2	2.14064
ENSG00000099810.21	MTAP	2.13844
ENSG00000004468.13	CD38	2.1383
ENSG00000169783.13	LINGO1	2.13721
ENSG00000255833.2	TIFAB	2.13677
ENSG00000136869.16	TLR4	2.13264
ENSG00000164120.14	HPGD	2.12965
ENSG00000067048.17	DDX3Y	2.12819
ENSG00000078399.19	HOXA9	2.1218
ENSG00000127951.8	FGL2	2.12154
ENSG00000066294.15	CD84	2.1185
ENSG00000132274.16	TRIM22	2.11609
ENSG00000009790.15	TRAF3IP3	2.11584
ENSG00000169429.11	CXCL8	2.11485
ENSG00000075884.14	ARHGAP15	2.11476
ENSG00000005379.17	TSPOAP1	2.11377
ENSG00000105851.11	PIK3CG	2.10616
ENSG00000072657.10	TRHDE	2.10544
ENSG00000132965.10	ALOX5AP	2.1011
ENSG00000180353.11	HCLS1	2.09811
ENSG00000198771.11	RCSD1	2.09784
ENSG00000107719.9	PALD1	2.09572
ENSG00000119866.22	BCL11A	2.09429
ENSG00000271605.6	MILR1	2.0922
ENSG00000163453.11	IGFBP7	2.09056
ENSG00000105383.15	CD33	2.07793
ENSG00000112799.9	LY86	2.07685
ENSG00000198848.13	CES1	2.07523
ENSG00000166509.12	CLEC3A	2.07308
ENSG00000112902.12	SEMA5A	2.07107
ENSG00000162496.9	DHRS3	2.06747
ENSG00000135069.14	PSAT1	2.06465
ENSG00000026025.16	VIM	2.06364
ENSG00000117020.19	AKT3	2.06201
ENSG00000229140.11	CCDC26	2.05935
ENSG00000127528.6	KLF2	2.05712
ENSG00000175857.9	GAPT	2.05291
ENSG00000104267.10	CA2	2.05176
ENSG00000140968.11	IRF8	2.05005
ENSG00000128965.13	CHAC1	2.04803
ENSG00000090376.11	IRAK3	2.04651
ENSG00000173198.6	CYSLTR1	2.04566
ENSG00000115963.14	RND3	2.04455
ENSG00000018510.18	AGPS	2.02995
ENSG00000162511.8	LAPTM5	2.02811
ENSG00000102524.12	TNFSF13B	2.02799
ENSG00000224078.15	SNHG14	2.02507
ENSG00000090382.7	LYZ	2.0227
ENSG00000121807.7	mRE	2.02059
ENSG00000151702.17	FLI1	2.01805
ENSG00000100055.21	CYTH4	2.01708
ENSG00000155629.15	PIK3AP1	2.01687
ENSG00000232653.8	GOLGA8N	2.00903
ENSG00000113396.13	SLC27A6	2.00898
ENSG00000175445.17	LPL	2.00651
ENSG00000122122.10	SASH3	1.99954
ENSG00000012817.16	KDM5D	1.99909
ENSG00000198795.11	ZNF521	1.99732
ENSG00000107551.21	RASSF4	1.99226
ENSG00000169413.3	RNASE6	1.99166
ENSG00000087495.17	PHACTR3	1.99097
ENSG00000271503.6	CCL5	1.98879
ENSG00000196460.14	RFX8	1.98292
ENSG00000139117.14	CPNE8	1.97998
ENSG00000197629.6	MPEG1	1.9768
ENSG00000285043.3	ALDOA	1.97605
ENSG00000197471.12	SPN	1.97546
ENSG00000164691.18	TAGAP	1.97484
ENSG00000177272.9	KCNA3	1.97367
ENSG00000185862.7	EVI2B	1.9728
ENSG00000143226.15	FCGR2A	1.9722
ENSG00000145335.17	SNCA	1.97045
ENSG00000174004.6	NRROS	1.96979
ENSG00000115165.10	CYTIP	1.9553
ENSG00000155926.14	SLA	1.94872
ENSG00000138964.17	PARVG	1.94544
ENSG00000120318.16	ARAP3	1.93251
ENSG00000275126.2	HIST1H4L	1.93211
ENSG00000204482.11	LST1	1.93121
ENSG00000183484.12	GPR132	1.92869
ENSG00000198692.10	EIF1AY	1.92623
ENSG00000170231.16	FABP6	1.92158
ENSG00000185519.9	FAM131C	1.91904
ENSG00000132205.11	EMILIN2	1.91579
ENSG00000110934.13	BIN2	1.91567
ENSG00000248334.6	WHAMMP2	1.9149
ENSG00000003096.14	KLHL13	1.9117
ENSG00000180318.4	ALX1	1.90596
ENSG00000157227.14	MMP14	1.90532
ENSG00000261652.3	C15orf65	1.90456
ENSG00000125810.10	CD93	1.90292
ENSG00000104894.12	CD37	1.9021
ENSG00000011600.12	TYROBP	1.90111
ENSG00000173110.8	HSPA6	1.90069
ENSG00000149294.17	NCAM1	1.89823
ENSG00000105464.4	GRIN2D	1.89814
ENSG00000104870.13	FCGRT	1.89633
ENSG00000188404.10	SELL	1.89625
ENSG00000272277.1	AL031963.3	1.89294
ENSG00000125869.10	LAMP5	1.89188
ENSG00000104951.16	IL4I1	1.88331
ENSG00000110324.11	IL10RA	1.88068
ENSG00000174125.8	TLR1	1.87982
ENSG00000106829.20	TLE4	1.87805
ENSG00000256229.8	ZNF486	1.87587
ENSG00000150337.14	FCGR1A	1.87138
ENSG00000132530.17	XAF1	1.86819
ENSG00000109861.17	CTSC	1.86677
ENSG00000103313.13	MEFV	1.86572
ENSG00000139278.10	GLIPR1	1.86571
ENSG00000183878.16	UTY	1.86304
ENSG00000165029.17	ABCA1	1.86036
ENSG00000160593.19	JAML	1.85545
ENSG00000204941.14	PSG5	1.85515
ENSG00000163131.12	CTSS	1.85493
ENSG00000162711.18	NLRP3	1.85213
ENSG00000244509.4	APOBEC3C	1.84626
ENSG00000183688.4	RFLNB	1.84572
ENSG00000115956.10	PLEK	1.84497
ENSG00000147206.17	NXF3	1.8392
ENSG00000122986.14	HVCN1	1.83503
ENSG00000003400.15	CASP10	1.83482
ENSG00000259092.1	TRAV30	1.83439
ENSG00000287016.1		1.82718
ENSG00000066336.12	SPI1	1.82647
ENSG00000204287.14	HLA-DRA	1.82213
ENSG00000080709.16	KCNN2	1.81413
ENSG00000166501.14	PRKCB	1.80849
ENSG00000248347.3	AC120036.1	1.80748
ENSG00000179456.10	ZBTB18	1.80666
ENSG00000231711.2	LINC00899	1.80646
ENSG00000255587.9	RAB44	1.80511
ENSG00000171533.12	MAP6	1.80463
ENSG00000108405.4	P2RX1	1.80352
ENSG00000124882.4	EREG	1.80186
ENSG00000211891.6	IGHE	1.80076
ENSG00000172164.15	SNTB1	1.79845
ENSG00000134874.18	DZIP1	1.79787
ENSG00000059377.18	TBXAS1	1.79546
ENSG00000155093.19	PTPRN2	1.79396
ENSG00000165168.8	CYBB	1.79179
ENSG00000120708.17	TGFBI	1.79099
ENSG00000110876.10	SELPLG	1.78943
ENSG00000197046.12	SIGLEC15	1.78396
ENSG00000000938.13	FGR	1.77181
ENSG00000100060.18	MFNG	1.76651
ENSG00000134242.16	PTPN22	1.76574
ENSG00000010310.9	GIPR	1.76214
ENSG00000135773.13	CAPN9	1.76014
ENSG00000163219.12	ARHGAP25	1.75842
ENSG00000171509.16	RXFP1	1.75522
ENSG00000095303.17	PTGS1	1.7547
ENSG00000155849.16	ELMO1	1.75429
ENSG00000168961.17	LGALS9	1.75326
ENSG00000100867.15	DHRS2	1.74957
ENSG00000162676.12	GFI1	1.74697
ENSG00000147465.12	STAR	1.74384
ENSG00000196427.14	NBPF4	1.74322
ENSG00000139915.21	MDGA2	1.7406
ENSG00000186832.9	KRT16	1.73895
ENSG00000101265.16	RASSF2	1.73591
ENSG00000085662.14	AKR1B1	1.73545
ENSG00000187688.15	TRPV2	1.73271
ENSG00000235568.7	NFAM1	1.73229
ENSG00000197506.8	SLC28A3	1.73013
ENSG00000166428.14	PLD4	1.72872
ENSG00000255774.2	AP000439.2	1.72862
ENSG00000178229.8	ZNF543	1.72685
ENSG00000159247.13	TUBBP5	1.71793
ENSG00000084110.11	HAL	1.71674
ENSG00000174808.12	BTC	1.71645
ENSG00000277159.1	AL139384.2	1.71636
ENSG00000171812.13	COL8A2	1.71195
ENSG00000139946.10	PELI2	1.71105
ENSG00000251410.2	AC007106.1	1.70915
ENSG00000223776.5	LGALS8-AS1	1.70777
ENSG00000176076.7	KCNE5	1.70683
ENSG00000167613.16	LAIR1	1.70522
ENSG00000143119.14	CD53	1.69755
ENSG00000121316.11	PLBD1	1.69733
ENSG00000100365.16	NCF4	1.69572
ENSG00000136286.16	MYO1G	1.69353
ENSG00000175040.6	CHST2	1.69322
ENSG00000134802.18	SLC43A3	1.68687
ENSG00000134193.15	REG4	1.68523
ENSG00000028137.19	TNFRSF1B	1.68292
ENSG00000133477.17	FAM83F	1.68128
ENSG00000143995.20	MEIS1	1.67905
ENSG00000081985.13	IL12RB2	1.67762
ENSG00000227418.6	PCGEM1	1.67475
ENSG00000107738.20	VSIR	1.67069
ENSG00000119535.18	CSF3R	1.67046
ENSG00000163823.4	CCR1	1.66989
ENSG00000100427.16	MLC1	1.66919
ENSG00000160219.12	GAB3	1.66859
ENSG00000140678.17	ITGAX	1.66832
ENSG00000124074.12	ENKD1	1.65964
ENSG00000163297.18	ANTXR2	1.65572
ENSG00000164794.9	KCNV1	1.6551
ENSG00000137841.12	PLCB2	1.65289
ENSG00000101307.16	SIRPB1	1.65159
ENSG00000238113.7	LINC01410	1.65037
ENSG00000044459.15	CNTLN	1.64872
ENSG00000004799.8	PDK4	1.64845
ENSG00000170523.3	KRT83	1.64837
ENSG00000186847.6	KRT14	1.6477
ENSG00000177707.11	NECTIN3	1.64551
ENSG00000130270.16	ATP8B3	1.64521
ENSG00000058091.17	CDK14	1.64312
ENSG00000070190.13	DAPP1	1.64312
ENSG00000253549.6	CA3-AS1	1.63668
ENSG00000154822.18	PLCL2	1.63407
ENSG00000126091.21	ST3GAL3	1.63281
ENSG00000232810.4	TNF	1.63169
ENSG00000267169.2	AC022098.1	1.63064
ENSG00000140368.13	PSTPIP1	1.62507
ENSG00000054219.11	LY75	1.62479
ENSG00000147251.16	DOCK11	1.62395
ENSG00000104814.13	MAP4K1	1.61762
ENSG00000147443.13	DOK2	1.61557
ENSG00000204792.2	LINC01291	1.61094
ENSG00000204261.9	PSMB8-AS1	1.61088
ENSG00000145757.16	SPATA9	1.6096
ENSG00000100628.12	ASB2	1.60905
ENSG00000145088.9	EAF2	1.6087
ENSG00000134061.5	CD180	1.60339
ENSG00000011422.12	PLAUR	1.5967
ENSG00000072818.12	ACAP1	1.59655
ENSG00000175505.11	CLCF1	1.59621
ENSG00000181449.4	SOX2	1.59104
ENSG00000276410.4	HIST1H2BB	1.58884
ENSG00000275215.1	RNA5-8SN4	1.58861
ENSG00000129675.16	ARHGEF6	1.5855
ENSG00000121552.4	CSTA	1.58494
ENSG00000139679.16	LPAR6	1.58365
ENSG00000123329.20	ARHGAP9	1.58315
ENSG00000116852.15	KIF21B	1.583
ENSG00000164236.12	ANKRD33B	1.5801
ENSG00000171777.16	RASGRP4	1.57956
ENSG00000128340.15	RAC2	1.57652
ENSG00000255153.1	TOLLIP-AS1	1.57648
ENSG00000154639.19	CXADR	1.57502
ENSG00000122224.18	LY9	1.5741
ENSG00000142583.18	SLC2A5	1.56959
ENSG00000167771.6	RCOR2	1.56944
ENSG00000186973.11	FAM183A	1.56862
ENSG00000110031.13	LPXN	1.5684
ENSG00000125354.24	SEPT6	1.56816
ENSG00000224899.1	AC019155.3	1.56587
ENSG00000265763.4	ZNF488	1.5648
ENSG00000162949.16	CAPN13	1.56417
ENSG00000177409.12	SAMD9L	1.56387
ENSG00000128408.9	RIBC2	1.55871
ENSG00000122025.15	FLT3	1.55721
ENSG00000059804.16	SLC2A3	1.55715
ENSG00000090104.12	RGS1	1.55539
ENSG00000073849.16	ST6GAL1	1.55296
ENSG00000266094.8	RASSF5	1.54993
ENSG00000145808.10	ADAMTS19	1.54693
ENSG00000179023.9	KLHDC7A	1.54566
ENSG00000198520.12	C1orf228	1.54553
ENSG00000117245.13	KIF17	1.54515
ENSG00000182986.15	ZNF320	1.54499
ENSG00000171488.15	LRRC8C	1.54271
ENSG00000125726.11	CD70	1.54095
ENSG00000073605.19	GSDMB	1.5348
ENSG00000167895.15	TMC8	1.53307
ENSG00000166473.17	PKD1L2	1.53259
ENSG00000244055.2	AC007566.1	1.53259
ENSG00000186470.14	BTN3A2	1.53195
ENSG00000084207.18	GSTP1	1.52938
ENSG00000089356.19	FXYD3	1.52844
ENSG00000167653.5	PSCA	1.52603
ENSG00000130818.12	ZNF426	1.52585
ENSG00000121966.7	CXCR4	1.52412
ENSG00000109113.20	RAB34	1.51705
ENSG00000186891.14	TNFRSF18	1.51021
ENSG00000104518.11	GSDMD	1.50807
ENSG00000225511.7	LINC00475	1.50611
ENSG00000148735.15	PLEKHS1	1.50525
ENSG00000130830.15	MPP1	1.50398
ENSG00000072195.15	SPEG	1.5031
ENSG00000141506.15	PIK3R5	1.50124
ENSG00000117472.10	TSPAN1	1.50026
ENSG00000181577.16	C6orf223	1.49746
ENSG00000087494.16	PTHLH	1.49551
ENSG00000135835.12	KIAA1614	1.4949
ENSG00000095370.20	SH2D3C	1.49351
ENSG00000132170.24	PPARG	1.4909
ENSG00000125398.8	SOX9	1.49027
ENSG00000197457.10	STMN3	1.48677
ENSG00000132386.11	SERPINF1	1.48472
ENSG00000196739.15	COL27A1	1.47899
ENSG00000198959.12	TGM2	1.47549
ENSG00000106789.13	CORO2A	1.47463
ENSG00000166401.15	SERPINB8	1.47431
ENSG00000236212.2	AC009262.1	1.47094
ENSG00000136490.9	LIMD2	1.46659
ENSG00000240859.3	AC093627.4	1.46629
ENSG00000139178.12	C1RL	1.46584
ENSG00000138449.11	SLC40A1	1.45602
ENSG00000071967.12	CYBRD1	1.45544
ENSG00000183486.14	MX2	1.44978
ENSG00000168398.7	BDKRB2	1.44899
ENSG00000152669.9	CCNO	1.44603
ENSG00000068366.21	ACSL4	1.44285
ENSG00000134627.12	PIWIL4	1.44037
ENSG00000152270.9	PDE3B	1.4382
ENSG00000150687.12	PRSS23	1.43813
ENSG00000104903.5	LYL1	1.43758
ENSG00000156968.9	MPV17L	1.43734
ENSG00000182578.14	CSF1R	1.43581
ENSG00000172349.18	IL16	1.43123
ENSG00000156966.7	B3GNT7	1.42974
ENSG00000181856.15	SLC2A4	1.42944
ENSG00000286646.1		1.42925
ENSG00000170271.11	FAXDC2	1.42909
ENSG00000142347.19	MYO1F	1.42378
ENSG00000231574.6	LINC02015	1.42364
ENSG00000196932.12	TMEM26	1.4228
ENSG00000178695.6	KCTD12	1.42239
ENSG00000122861.16	PLAU	1.4214
ENSG00000092421.17	SEMA6A	1.42032
ENSG00000068831.19	RASGRP2	1.41788
ENSG00000135916.16	ITM2C	1.41708
ENSG00000198053.12	SIRPA	1.41396
ENSG00000230454.1	U73166.1	1.4112
ENSG00000147889.18	CDKN2A	1.41117
ENSG00000115194.11	SLC30A3	1.41063
ENSG00000158747.15	NBL1	1.41035
ENSG00000184584.13	TMEM173	1.40555
ENSG00000163171.8	CDC42EP3	1.40213
ENSG00000197847.12	SLC22A20P	1.40189
ENSG00000197937.13	ZNF347	1.40147
ENSG00000159674.12	SPON2	1.40041
ENSG00000287900.1		1.3974
ENSG00000008323.16	PLEKHG6	1.3933
ENSG00000250067.12	YJEFN3	1.39232
ENSG00000134013.16	LOXL2	1.38724
ENSG00000197496.6	SLC2A10	1.38677
ENSG00000077935.17	SMC1B	1.38591
ENSG00000188921.14	HACD4	1.38373
ENSG00000270673.1	YTHDF3-AS1	1.38285
ENSG00000023445.16	BIRC3	1.38121
ENSG00000167207.14	NOD2	1.38014
ENSG00000076641.4	PAG1	1.37997
ENSG00000267757.4	EML2-AS1	1.37782
ENSG00000069482.7	GAL	1.37718
ENSG00000127220.6	ABHD8	1.37669
ENSG00000171320.15	ESCO2	1.37516
ENSG00000176024.18	ZNF613	1.3736
ENSG00000102445.20	RUBCNL	1.37183
ENSG00000196730.13	DAPK1	1.36959
ENSG00000131746.13	TNS4	1.36897
ENSG00000136099.13	PCDH8	1.36855
ENSG00000160255.18	ITGB2	1.36636
ENSG00000074657.14	ZNF532	1.36629
ENSG00000111716.14	LDHB	1.36558
ENSG00000279631.1	AL158211.5	1.36045
ENSG00000178752.16	ERFE	1.35888
ENSG00000147642.17	SYBU	1.35699
ENSG00000105523.4	FAM83E	1.3562
ENSG00000116396.15	KCNC4	1.35523
ENSG00000197892.13	KIF13B	1.35032
ENSG00000069011.16	PITX1	1.34854
ENSG00000175556.17	LONRF3	1.34796
ENSG00000136040.9	PLXNC1	1.34744
ENSG00000170542.6	SERPINB9	1.34393
ENSG00000105696.9	TMEM59L	1.34353
ENSG00000123119.12	NECAB1	1.3428
ENSG00000068976.14	PYGM	1.3422
ENSG00000185905.4	C16orf54	1.34197
ENSG00000167851.15	CD300A	1.34109
ENSG00000156509.14	FBXO43	1.33917
ENSG00000157445.15	CACNA2D3	1.33853
ENSG00000229473.2	RGS17P1	1.33269
ENSG00000215417.13	MIR17HG	1.32754
ENSG00000267795.6	SMIM22	1.32622
ENSG00000263639.7	MSMB	1.32608
ENSG00000105929.16	ATP6V0A4	1.32124
ENSG00000244405.8	ETV5	1.31827
ENSG00000176595.4	KBTBD11	1.31819
ENSG00000130052.14	STARD8	1.31818
ENSG00000204442.4	FAM155A	1.31768
ENSG00000171310.11	CHST11	1.3174
ENSG00000170786.13	SDR16C5	1.31709
ENSG00000214212.9	C19orf38	1.31242
ENSG00000152377.14	SPOCK1	1.31175
ENSG00000182836.10	PLCXD3	1.30693
ENSG00000198189.11	HSD17B11	1.30566
ENSG00000112276.14	BVES	1.30511
ENSG00000182459.5	TEX19	1.3027
ENSG00000122591.13	FAM126A	1.30116
ENSG00000135596.18	MICAL1	1.29991
ENSG00000225077.3	LINC00337	1.29872
ENSG00000139055.7	ERP27	1.29608
ENSG00000230844.3	ZNF674-AS1	1.2943
ENSG00000106785.15	TRIM14	1.29262
ENSG00000168754.15	FAM178B	1.28942
ENSG00000010810.17	FYN	1.28727
ENSG00000037280.16	FLT4	1.28532
ENSG00000164796.18	CSMD3	1.28468
ENSG00000138496.17	PARP9	1.28311
ENSG00000140511.12	HAPLN3	1.28281
ENSG00000083454.22	P2RX5	1.27949
ENSG00000073910.23	FRY	1.27786
ENSG00000111339.12	ART4	1.27716
ENSG00000259562.2	AC090607.2	1.27419
ENSG00000136158.12	SPRY2	1.2738
ENSG00000151376.18	ME3	1.27333
ENSG00000205413.8	SAMD9	1.27146
ENSG00000149781.13	FERMT3	1.26969
ENSG00000118507.18	AKAP7	1.2692
ENSG00000196371.4	FUT4	1.26798
ENSG00000060558.4	GNA15	1.26532
ENSG00000135363.12	LMO2	1.26456
ENSG00000111341.10	MGP	1.26453
ENSG00000221963.6	APOL6	1.26319
ENSG00000015285.11	WAS	1.26061
ENSG00000005243.10	COPZ2	1.25919
ENSG00000167646.14	DNAAF3	1.25636
ENSG00000127824.15	TUBA4A	1.2537
ENSG00000120899.18	PTK2B	1.25363
ENSG00000085117.12	CD82	1.25298
ENSG00000168071.22	CCDC88B	1.2508
ENSG00000131650.14	KREMEN2	1.25064
ENSG00000187210.14	GCNT1	1.25061
ENSG00000138587.6	MNS1	1.25061
ENSG00000131378.14	RFTN1	1.24881
ENSG00000122592.8	HOXA7	1.24787
ENSG00000259459.6	LINC02568	1.24705
ENSG00000136689.19	IL1RN	1.24564
ENSG00000265702.2	AC005821.1	1.24493
ENSG00000196154.12	S100A4	1.24332
ENSG00000109321.11	AREG	1.24227
ENSG00000130066.17	SAT1	1.24109
ENSG00000089327.15	FXYD5	1.24015
ENSG00000184254.17	ALDH1A3	1.2393
ENSG00000100097.12	LGALS1	1.23854
ENSG00000150995.21	ITPR1	1.23763
ENSG00000165259.14	HDX	1.23758
ENSG00000116701.15	NCF2	1.23757
ENSG00000253125.1	AC055854.1	1.23645
ENSG00000184012.14	TMPRSS2	1.23526
ENSG00000154511.12	FAM69A	1.23345
ENSG00000146859.6	TMEM140	1.23083
ENSG00000143333.7	RGS16	1.23039
ENSG00000121281.13	ADCY7	1.23014
ENSG00000020181.18	ADGRA2	1.22996
ENSG00000122707.12	RECK	1.22651
ENSG00000124813.23	RUNX2	1.22422
ENSG00000283078.1	AL137077.2	1.22313
ENSG00000159885.14	ZNF222	1.22108
ENSG00000142149.9	HUNK	1.22068
ENSG00000169403.12	PTAFR	1.21521
ENSG00000132481.7	TRIM47	1.21391
ENSG00000159905.15	ZNF221	1.21376
ENSG00000092621.13	PHGDH	1.21309
ENSG00000213023.11	SYT3	1.20857
ENSG00000287262.1		1.20838
ENSG00000012171.20	SEMA3B	1.20691
ENSG00000287390.1		1.20375
ENSG00000158186.13	MRAS	1.20293
ENSG00000233087.8	RAB6D	1.19942
ENSG00000128203.7	ASPHD2	1.19565
ENSG00000181019.13	NQO1	1.19543
ENSG00000176597.12	B3GNT5	1.19532
ENSG00000270804.1	AC010326.4	1.19412
ENSG00000250240.6	AC008840.1	1.19286
ENSG00000154640.15	BTG3	1.19173
ENSG00000269313.5	MAGIX	1.19099
ENSG00000175874.10	CREG2	1.1878
ENSG00000134072.11	CAMK1	1.18626
ENSG00000236137.1	AL445231.1	1.18564
ENSG00000283674.3	AC068587.4	1.18393
ENSG00000114115.10	RBP1	1.18387
ENSG00000157654.19	PALM2-AKAP2	1.18337
ENSG00000006016.12	CRLF1	1.1831
ENSG00000149231.16	CCDC82	1.18305
ENSG00000255052.5	FAM66D	1.1826
ENSG00000182348.7	ZNF804B	1.17986
ENSG00000276141.4	WHAMMP3	1.1781
ENSG00000182179.13	UBA7	1.17717
ENSG00000256751.6	PLBD1-AS1	1.17425
ENSG00000198363.18	ASPH	1.17226
ENSG00000100490.10	CDKL1	1.17202
ENSG00000158286.13	RNF207	1.16918
ENSG00000224358.1	AL451074.2	1.1687
ENSG00000140030.6	GPR65	1.16646
ENSG00000160961.12	ZNF333	1.1645
ENSG00000187848.15	P2RX2	1.1642
ENSG00000088992.18	TESC	1.16404
ENSG00000262904.1	TMPOP2	1.16286
ENSG00000184661.14	CDCA2	1.16197
ENSG00000135744.9	AGT	1.16064
ENSG00000105122.13	RASAL3	1.1592
ENSG00000154920.15	EME1	1.15866
ENSG00000143507.18	DUSP10	1.15774
ENSG00000171502.15	COL24A1	1.15736
ENSG00000204923.4	FBXO48	1.15346
ENSG00000162989.5	KCNJ3	1.15313
ENSG00000148225.16	WDR31	1.15186
ENSG00000277969.1	AC006449.6	1.15149
ENSG00000183150.8	GPR19	1.15073
ENSG00000139318.8	DUSP6	1.15013
ENSG00000159388.6	BTG2	1.14879
ENSG00000133328.4	HRASLS2	1.14797
ENSG00000245213.7	AC105285.1	1.14662
ENSG00000257704.4	INAFM1	1.14487
ENSG00000100985.7	MMP9	1.14314
ENSG00000259306.2	AC020891.2	1.14266
ENSG00000163864.17	NMNAT3	1.13954
ENSG00000135776.5	ABCB10	1.13761
ENSG00000023892.11	DEF6	1.13589
ENSG00000188042.8	ARL4C	1.13523
ENSG00000108786.11	HSD17B1	1.13381
ENSG00000088881.21	EBF4	1.13301
ENSG00000163359.17	COL6A3	1.13265
ENSG00000275714.2	HIST1H3A	1.13101
ENSG00000104974.12	LILRA1	1.12991
ENSG00000179542.16	SLITRK4	1.12824
ENSG00000106366.9	SERPINE1	1.12718
ENSG00000152034.11	MCHR2	1.12566
ENSG00000284526.1	AC015802.6	1.12516
ENSG00000145779.8	TNFAIP8	1.12472
ENSG00000280287.1	AC131212.3	1.12354
ENSG00000123388.4	HOXC11	1.12074
ENSG00000167554.15	ZNF610	1.11994
ENSG00000181458.10	TMEM45A	1.11213
ENSG00000151012.13	SLC7A11	1.11031
ENSG00000188641.14	DPYD	1.10888
ENSG00000104219.13	ZDHHC2	1.10846
ENSG00000183784.7	C9orf66	1.10693
ENSG00000157470.12	FAM81A	1.1064
ENSG00000142627.13	EPHA2	1.10556
ENSG00000114450.11	GNB4	1.10527
ENSG00000140538.16	NTRK3	1.10512
ENSG00000149573.9	MPZL2	1.10031
ENSG00000260742.1	AC009962.1	1.09923
ENSG00000188266.14	HYKK	1.09726
ENSG00000273445.1	AC133644.2	1.093
ENSG00000201302.1	SNORA65	1.09244
ENSG00000243137.8	PSG4	1.09182
ENSG00000135519.8	KCNH3	1.08876
ENSG00000178538.10	CA8	1.08738
ENSG00000287080.2		1.08374
ENSG00000167799.10	NUDT8	1.08275
ENSG00000138829.12	FBN2	1.08251
ENSG00000011028.14	MRC2	1.08251
ENSG00000197472.15	ZNF695	1.08246
ENSG00000116016.14	EPAS1	1.07825
ENSG00000204264.12	PSMB8	1.07801
ENSG00000203760.9	CENPW	1.07647
ENSG00000267886.1	AC074135.1	1.07641
ENSG00000162390.18	ACOT11	1.07526
ENSG00000270964.1	AC016355.1	1.07518
ENSG00000268061.5	NAPA-AS1	1.07431
ENSG00000223523.1	AC092598.1	1.07395
ENSG00000230836.1	LINC01293	1.07215
ENSG00000101400.6	SNTA1	1.07211
ENSG00000166068.13	SPRED1	1.07194
ENSG00000170465.10	KRT6C	1.07127
ENSG00000179820.16	MYADM	1.06971
ENSG00000105137.13	SYDE1	1.06605
ENSG00000254251.1	AC103770.1	1.06541
ENSG00000138080.14	EMILIN1	1.06382
ENSG00000085840.13	ORC1	1.06325
ENSG00000236876.3	TMSB4XP1	1.0632
ENSG00000129355.7	CDKN2D	1.0624
ENSG00000125462.19	C1orf61	1.06203
ENSG00000150051.14	MKX	1.06119
ENSG00000135605.13	TEC	1.06115
ENSG00000005189.20	REXO5	1.06035
ENSG00000170425.4	ADORA2B	1.06012
ENSG00000115221.12	ITGB6	1.05888
ENSG00000234745.13	HLA-B	1.05794
ENSG00000161960.16	EIF4A1	1.05667
ENSG00000105339.11	DENND3	1.05576
ENSG00000197971.16	MBP	1.05485
ENSG00000185215.11	TNFAIP2	1.05479
ENSG00000065600.13	TMEM206	1.05149
ENSG00000073282.14	TP63	1.04876
ENSG00000135116.9	HRK	1.04847
ENSG00000159231.6	CBR3	1.04719
ENSG00000133863.9	TEX15	1.04626
ENSG00000204778.4	CBWD4P	1.04617
ENSG00000101311.16	FERMT1	1.0454
ENSG00000070731.11	ST6GALNAC2	1.04497
ENSG00000261578.1	AP003119.3	1.04424
ENSG00000095752.7	IL11	1.04306
ENSG00000278023.7	RDM1	1.04264
ENSG00000182168.15	UNC5C	1.04109
ENSG00000111247.15	RAD51AP1	1.04066
ENSG00000019186.10	CYP24A1	1.04055
ENSG00000267041.6	ZNF850	1.03917
ENSG00000233654.2	AC108047.1	1.03915
ENSG00000092470.12	WDR76	1.03878
ENSG00000135636.15	DYSF	1.03861
ENSG00000165025.15	SYK	1.03764
ENSG00000196126.11	HLA-DRB1	1.03728
ENSG00000139626.16	ITGB7	1.03578
ENSG00000088340.17	FER1L4	1.03462
ENSG00000185869.15	ZNF829	1.03367
ENSG00000147536.12	GINS4	1.03363
ENSG00000189007.16	ADAT2	1.03357
ENSG00000135439.12	AGAP2	1.03189
ENSG00000104689.10	TNFRSF10A	1.03022
ENSG00000116885.18	OSCP1	1.02953
ENSG00000186792.17	HYAL3	1.02617
ENSG00000125148.7	MT2A	1.02597
ENSG00000149557.14	FEZ1	1.02514
ENSG00000183647.11	ZNF530	1.02309
ENSG00000138650.9	PCDH10	1.01992
ENSG00000273018.7	AC107983.2	1.01932
ENSG00000170075.10	GPR37L1	1.01808
ENSG00000187123.15	LYPD6	1.01791
ENSG00000196814.15	MVB12B	1.01787
ENSG00000278637.2	HIST1H4A	1.01569
ENSG00000082212.13	ME2	1.01485
ENSG00000110975.8	SYT10	1.0145
ENSG00000176406.23	RIMS2	1.01219
ENSG00000150540.14	HNMT	1.01166
ENSG00000168487.20	BMP1	1.01022
ENSG00000117650.13	NEK2	1.00744
ENSG00000110080.20	ST3GAL4	1.00645
ENSG00000260018.1	AC040169.1	1.00461
ENSG00000214706.12	IFRD2	1.00455
ENSG00000185112.6	FAM43A	1.00289
ENSG00000144395.18	CCDC150	1.0026
ENSG00000187187.14	ZNF546	1.00185
ENSG00000074935.14	TUBE1	1.00058
ENSG00000232809.1	VDAC1P10	-8.75372
ENSG00000126549.11	STATH	-8.49998
ENSG00000251363.3	LINC02315	-7.85829
ENSG00000223729.1	LINC02247	-6.24407
ENSG00000218336.9	TENM3	-6.17036
ENSG00000154545.17	MAGED4	-5.96168
ENSG00000185306.13	C12orf56	-5.71719
ENSG00000226383.7	LINC01876	-5.68969
ENSG00000162944.11	RFTN2	-5.05145
ENSG00000225882.1	LINC01456	-4.87349
ENSG00000256870.3	SLC5A8	-4.80478
ENSG00000124333.16	VAMP7	-4.746
ENSG00000147246.10	HTR2C	-4.29429
ENSG00000234224.3	TMEM229A	-4.23206
ENSG00000164411.12	GJB7	-4.17107
ENSG00000135218.19	CD36	-4.09527
ENSG00000198947.18	DMD	-4.00918
ENSG00000196604.13	POTEF	-3.95541
ENSG00000274585.1	RNU2-1	-3.94607
ENSG00000006747.15	SCIN	-3.92404
ENSG00000150471.17	ADGRL3	-3.82393
ENSG00000205517.13	RGL3	-3.82104
ENSG00000144891.19	AGTR1	-3.78817
ENSG00000268864.4	AC011487.2	-3.64992
ENSG00000162891.11	IL20	-3.47478
ENSG00000196335.13	STK31	-3.45107
ENSG00000145824.13	CXCL14	-3.11433
ENSG00000091136.15	LAMB1	-3.0922
ENSG00000170477.13	KRT4	-2.98671
ENSG00000104368.19	PLAT	-2.93413
ENSG00000125508.4	SRMS	-2.93102
ENSG00000122641.11	INHBA	-2.92991
ENSG00000170289.13	CNGB3	-2.90148
ENSG00000150281.7	CTF1	-2.78183
ENSG00000185737.13	NRG3	-2.77906
ENSG00000260976.2	LINC01633	-2.69112
ENSG00000260604.2	AL590004.4	-2.65227
ENSG00000245970.2	AP003352.1	-2.64805
ENSG00000082482.14	KCNK2	-2.64576
ENSG00000166828.3	SCNN1G	-2.60051
ENSG00000236975.2	AL137793.1	-2.58438
ENSG00000158482.10	SNX29P1	-2.56779
ENSG00000170011.14	MYRIP	-2.55414
ENSG00000100276.10	RASL10A	-2.55295
ENSG00000251026.2	LINC02163	-2.54808
ENSG00000253768.1	AC008663.1	-2.5369
ENSG00000113248.6	PCDHB15	-2.52375
ENSG00000283342.1	AC241584.2	-2.50201
ENSG00000115474.7	KCNJ13	-2.49619
ENSG00000171401.15	KRT13	-2.45714
ENSG00000125851.10	PCSK2	-2.40733
ENSG00000164619.10	BMPER	-2.40325
ENSG00000136574.19	GATA4	-2.37778
ENSG00000187889.13	FYB2	-2.36206
ENSG00000258655.2	ARHGAP5-AS1	-2.36088
ENSG00000047662.5	FAM184B	-2.35662
ENSG00000286836.1		-2.33181
ENSG00000158270.12	COLEC12	-2.33039
ENSG00000162814.11	SPATA17	-2.3172
ENSG00000151320.11	AKAP6	-2.31298
ENSG00000235217.6	TSPY26P	-2.28355
ENSG00000168772.11	CXXC4	-2.27902
ENSG00000003137.9	CYP26B1	-2.26891
ENSG00000103528.17	SYT17	-2.25509
ENSG00000262714.1	AC007342.5	-2.23452
ENSG00000178031.18	ADAMTSL1	-2.22205
ENSG00000099954.19	CECR2	-2.2066
ENSG00000115380.20	EFEMP1	-2.205
ENSG00000168679.18	SLC16A4	-2.20148
ENSG00000111186.13	WNT5B	-2.20113
ENSG00000174827.14	PDZK1	-2.18587
ENSG00000106304.16	SPAM1	-2.17042
ENSG00000139547.8	RDH16	-2.16927
ENSG00000108771.13	DHX58	-2.16741
ENSG00000136235.17	GPNMB	-2.16193
ENSG00000180347.14	CCDC129	-2.14576
ENSG00000157064.11	NMNAT2	-2.13502
ENSG00000100078.4	PLA2G3	-2.1237
ENSG00000170965.10	PLAC1	-2.11701
ENSG00000144290.17	SLC4A10	-2.11692
ENSG00000143536.7	CRNN	-2.08996
ENSG00000152128.13	TMEM163	-2.06197
ENSG00000169856.9	ONECUT1	-2.03945
ENSG00000100234.12	TIMP3	-2.03388
ENSG00000154330.13	PGM5	-2.00753
ENSG00000004948.16	CALCR	-2.00311
ENSG00000092758.18	COL9A3	-1.9884
ENSG00000273149.1	AL138963.3	-1.96949
ENSG00000258711.2	AL358334.2	-1.95826
ENSG00000182985.18	CADM1	-1.95137
ENSG00000165194.15	PCDH19	-1.94196
ENSG00000286058.1		-1.91926
ENSG00000267009.6	AC007780.1	-1.9167
ENSG00000168447.11	SCNN1B	-1.91638
ENSG00000171033.13	PKIA	-1.9088
ENSG00000182103.5	FAM181B	-1.88414
ENSG00000095585.17	BLNK	-1.8741
ENSG00000184557.4	SOCS3	-1.87181
ENSG00000147180.17	ZNF711	-1.85345
ENSG00000169247.14	SH3TC2	-1.84447
ENSG00000151322.20	NPAS3	-1.84263
ENSG00000124749.17	COL21A1	-1.82875
ENSG00000174469.23	CNTNAP2	-1.82802
ENSG00000177791.12	MYOZ1	-1.82394
ENSG00000228570.8	NUTM2E	-1.79948
ENSG00000164128.7	NPY1R	-1.79822
ENSG00000112183.15	RBM24	-1.77449
ENSG00000286223.1		-1.74269
ENSG00000088543.15	C3orf18	-1.73836
ENSG00000127578.7	WFIKKN1	-1.73368
ENSG00000143882.12	ATP6V1C2	-1.73088
ENSG00000177508.12	IRX3	-1.72723
ENSG00000156925.12	ZIC3	-1.72591
ENSG00000257191.1	AC090709.1	-1.72355
ENSG00000187398.12	LUZP2	-1.71633
ENSG00000143365.19	RORC	-1.71592
ENSG00000185567.7	AHNAK2	-1.69386
ENSG00000168491.10	CCDC110	-1.68688
ENSG00000283828.1	AL137002.2	-1.68519
ENSG00000135048.14	TMEM2	-1.67535
ENSG00000151718.16	WWC2	-1.67519
ENSG00000142319.18	SLC6A3	-1.66583
ENSG00000205730.7	ITPRIPL2	-1.66513
ENSG00000223808.1	AC044784.1	-1.66414
ENSG00000171992.13	SYNPO	-1.65272
ENSG00000273301.1	AC016717.2	-1.65091
ENSG00000105707.15	HPN	-1.64921
ENSG00000204262.14	COL5A2	-1.645
ENSG00000142494.13	SLC47A1	-1.62174
ENSG00000118777.12	ABCG2	-1.61993
ENSG00000234840.2	LINC01239	-1.61179
ENSG00000164129.12	NPY5R	-1.6037
ENSG00000100626.17	GALNT16	-1.6032
ENSG00000173698.18	ADGRG2	-1.60287
ENSG00000135549.15	PKIB	-1.60211
ENSG00000138411.13	HECW2	-1.59861
ENSG00000244153.1	WWP1P1	-1.595
ENSG00000022267.19	FHL1	-1.59362
ENSG00000156103.16	MMP16	-1.5888
ENSG00000167968.13	DNASE1L2	-1.58852
ENSG00000264577.1	AC010761.1	-1.58422
ENSG00000173262.12	SLC2A14	-1.5818
ENSG00000120693.14	SMAD9	-1.57331
ENSG00000261888.1	AC144831.1	-1.57202
ENSG00000198513.14	ATL1	-1.56591
ENSG00000175356.14	SCUBE2	-1.5657
ENSG00000125968.9	ID1	-1.56178
ENSG00000254343.2	AC091563.1	-1.55547
ENSG00000183230.18	CTNNA3	-1.55322
ENSG00000111816.8	FRK	-1.55118
ENSG00000249916.1	AC119150.1	-1.5458
ENSG00000084628.10	NKAIN1	-1.54466
ENSG00000123095.6	BHLHE41	-1.5404
ENSG00000138696.11	BMPR1B	-1.53683
ENSG00000163141.20	BNIPL	-1.53421
ENSG00000076356.7	PLXNA2	-1.52982
ENSG00000240891.8	PLCXD2	-1.52947
ENSG00000234287.1	AC099560.2	-1.52289
ENSG00000280071.4	FP565260.6	-1.5125
ENSG00000171759.10	PAH	-1.51211
ENSG00000182489.9	XKRX	-1.5114
ENSG00000129595.14	EPB41L4A	-1.50943
ENSG00000269028.3	MTRNR2L12	-1.50765
ENSG00000259146.4	AC005476.2	-1.50725
ENSG00000173947.14	PIFO	-1.49081
ENSG00000115461.5	IGFBP5	-1.49007
ENSG00000164949.8	GEM	-1.48906
ENSG00000189127.8	ANKRD34B	-1.4873
ENSG00000187105.9	HEATR4	-1.48171
ENSG00000116675.16	DNAJC6	-1.47884
ENSG00000116141.17	MARK1	-1.46654
ENSG00000198807.13	PAX9	-1.46484
ENSG00000042062.13	RIPOR3	-1.46058
ENSG00000139364.11	TMEM132B	-1.45893
ENSG00000145526.12	CDH18	-1.45782
ENSG00000011201.12	ANOS1	-1.45442
ENSG00000176399.4	DMRTA1	-1.45242
ENSG00000102271.14	KLHL4	-1.44981
ENSG00000151729.11	SLC25A4	-1.44479
ENSG00000227579.6	AL122019.1	-1.44156
ENSG00000164626.9	KCNK5	-1.44032
ENSG00000265735.2	RN7SL5P	-1.43597
ENSG00000073792.16	IGF2BP2	-1.43084
ENSG00000178685.14	PARP10	-1.42937
ENSG00000197249.14	SERPINA1	-1.42764
ENSG00000064195.7	DLX3	-1.42544
ENSG00000144824.21	PHLDB2	-1.4232
ENSG00000130707.18	ASS1	-1.42229
ENSG00000134531.10	EMP1	-1.42147
ENSG00000143036.17	SLC44A3	-1.41914
ENSG00000143416.21	SELENBP1	-1.41864
ENSG00000166780.11	C16orf45	-1.41634
ENSG00000123612.16	ACVR1C	-1.40752
ENSG00000163209.15	SPRR3	-1.39991
ENSG00000243244.7	STON1	-1.39937
ENSG00000150893.11	FREM2	-1.39856
ENSG00000084444.14	FAM234B	-1.39117
ENSG00000133937.5	GSC	-1.39086
ENSG00000102038.16	SMARCA1	-1.38583
ENSG00000255690.3	TRIL	-1.37914
ENSG00000157600.12	TMEM164	-1.37745
ENSG00000134245.18	WNT2B	-1.37673
ENSG00000148677.7	ANKRD1	-1.37655
ENSG00000139352.4	ASCL1	-1.37464
ENSG00000133661.17	SFTPD	-1.3727
ENSG00000115896.16	PLCL1	-1.3668
ENSG00000218426.5	AL590867.2	-1.36189
ENSG00000156587.16	UBE2L6	-1.35869
ENSG00000168556.7	ING2	-1.35643
ENSG00000197415.12	VEPH1	-1.35599
ENSG00000102934.10	PLLP	-1.35545
ENSG00000148848.15	ADAM12	-1.35522
ENSG00000236937.2	PTGES3P4	-1.35151
ENSG00000165023.7	DIRAS2	-1.3507
ENSG00000268204.1	AC008763.1	-1.34963
ENSG00000246350.1	AL049543.1	-1.34848
ENSG00000146038.12	DCDC2	-1.34786
ENSG00000215218.4	UBE2QL1	-1.33557
ENSG00000135362.14	PRR5L	-1.3303
ENSG00000130635.16	COL5A1	-1.32349
ENSG00000188886.4	ASTL	-1.3207
ENSG00000130203.10	APOE	-1.31865
ENSG00000049130.16	KITLG	-1.31306
ENSG00000172403.11	SYNPO2	-1.31174
ENSG00000126016.17	AMOT	-1.31133
ENSG00000139304.16	PTPRQ	-1.30841
ENSG00000178075.20	GRAMD1C	-1.30654
ENSG00000261777.6	AC012184.3	-1.30536
ENSG00000138735.16	PDE5A	-1.3042
ENSG00000135063.20	FAM189A2	-1.30229
ENSG00000265401.1	AC093484.3	-1.30048
ENSG00000226781.1	TBCAP1	-1.29756
ENSG00000138622.4	HCN4	-1.297
ENSG00000080644.16	CHRNA3	-1.29139
ENSG00000168785.8	TSPAN5	-1.28932
ENSG00000287354.1		-1.28817
ENSG00000187068.3	C3orf70	-1.28789
ENSG00000185133.14	INPP5J	-1.28597
ENSG00000132141.14	CCT6B	-1.28067
ENSG00000105974.13	CAV1	-1.27979
ENSG00000154721.15	JAM2	-1.27801
ENSG00000163638.13	ADAMTS9	-1.27756
ENSG00000111799.22	COL12A1	-1.27581
ENSG00000162407.9	PLPP3	-1.2756
ENSG00000260025.1	AC009414.2	-1.27397
ENSG00000186522.15	SEPT10	-1.27365
ENSG00000164251.5	F2RL1	-1.27057
ENSG00000273982.1	AC005746.3	-1.26986
ENSG00000189410.12	SH2D5	-1.26611
ENSG00000163508.13	EOMES	-1.26396
ENSG00000108679.13	LGALS3BP	-1.26252
ENSG00000262152.7	LINC00514	-1.26248
ENSG00000248360.7	LINC00504	-1.26244
ENSG00000185338.7	SOCS1	-1.25855
ENSG00000175893.12	ZDHHC21	-1.2577
ENSG00000038427.16	VCAN	-1.25618
ENSG00000158246.8	FAM46B	-1.25549
ENSG00000258072.1	AC126177.7	-1.25418
ENSG00000210195.2	MT-TT	-1.25379
ENSG00000132746.15	ALDH3B2	-1.2491
ENSG00000242732.4	RTL5	-1.24451
ENSG00000283075.1	AL157931.2	-1.24059
ENSG00000144677.15	CTDSPL	-1.2394
ENSG00000168016.15	TRANK1	-1.23602
ENSG00000167080.9	B4GALNT2	-1.23424
ENSG00000110195.14	FOLR1	-1.22957
ENSG00000260912.1	AL158206.1	-1.22513
ENSG00000260430.2	AC099518.1	-1.22344
ENSG00000270265.1	AC104819.3	-1.22097
ENSG00000124343.14	XG	-1.21909
ENSG00000189334.9	S100A14	-1.21385
ENSG00000107362.14	ABHD17B	-1.21083
ENSG00000267809.1	NDUFV2P1	-1.21033
ENSG00000183098.11	GPC6	-1.20904
ENSG00000277215.2	SPANXA2-OT1	-1.20703
ENSG00000288559.1		-1.19885
ENSG00000186212.4	SOWAHB	-1.19641
ENSG00000013583.10	HEBP1	-1.19378
ENSG00000213598.4	AL049873.1	-1.18737
ENSG00000188176.12	SMTNL2	-1.18227
ENSG00000240889.1	NDUFB2-AS1	-1.18087
ENSG00000261754.2	AC008555.1	-1.1806
ENSG00000135643.5	KCNMB4	-1.17656
ENSG00000171346.16	KRT15	-1.17541
ENSG00000171451.15	DSEL	-1.1744
ENSG00000049323.16	LTBP1	-1.17425
ENSG00000274020.4	LINC01138	-1.17296
ENSG00000182700.5	IGIP	-1.17245
ENSG00000143450.19	OAZ3	-1.16394
ENSG00000155961.5	RAB39B	-1.16252
ENSG00000251259.1	AC004069.1	-1.15949
ENSG00000157388.20	CACNA1D	-1.15925
ENSG00000105971.15	CAV2	-1.15809
ENSG00000164442.10	CITED2	-1.15511
ENSG00000070778.13	PTPN21	-1.15399
ENSG00000288658.1		-1.1539
ENSG00000153558.16	FBXL2	-1.15296
ENSG00000251138.7	AC090502.1	-1.15285
ENSG00000013619.15	MAMLD1	-1.15106
ENSG00000114279.15	FGF12	-1.14986
ENSG00000224546.2	EIF4BP3	-1.14863
ENSG00000281332.1	LINC00997	-1.14777
ENSG00000180801.14	ARSJ	-1.1457
ENSG00000264964.2	AP001033.1	-1.14533
ENSG00000189058.9	APOD	-1.14201
ENSG00000197385.6	ZNF860	-1.14073
ENSG00000117479.15	SLC19A2	-1.13631
ENSG00000056487.16	PHF21B	-1.13559
ENSG00000101194.18	SLC17A9	-1.13293
ENSG00000166750.10	SLFN5	-1.13235
ENSG00000153395.10	LPCAT1	-1.13181
ENSG00000258701.1	LINC00638	-1.13107
ENSG00000278784.1	AL136295.7	-1.12479
ENSG00000197555.10	SIPA1L1	-1.12159
ENSG00000160207.9	HSF2BP	-1.12008
ENSG00000064042.18	LIMCH1	-1.1173
ENSG00000214575.10	CPEB1	-1.11723
ENSG00000144749.14	LRIG1	-1.11587
ENSG00000196119.8	OR8A1	-1.11461
ENSG00000130962.18	PRRG1	-1.11378
ENSG00000153563.16	CD8A	-1.10999
ENSG00000279726.2	AC005609.5	-1.10954
ENSG00000010704.19	HFE	-1.1086
ENSG00000160183.17	TMPRSS3	-1.108
ENSG00000162782.16	TDRD5	-1.10792
ENSG00000162433.15	AK4	-1.10715
ENSG00000134716.11	CYP2J2	-1.10689
ENSG00000282164.3	PEG13	-1.10545
ENSG00000170500.13	LONRF2	-1.10383
ENSG00000249641.2	HOXC13-AS	-1.10233
ENSG00000220323.4	HIST2H2BD	-1.1019
ENSG00000114993.17	RTKN	-1.09908
ENSG00000285906.2		-1.09666
ENSG00000261716.2	AC239868.1	-1.09563
ENSG00000221792.1	MIR1282	-1.09517
ENSG00000255346.10	NOX5	-1.09481
ENSG00000113739.11	STC2	-1.0947
ENSG00000171723.16	GPHN	-1.09424
ENSG00000178826.11	TMEM139	-1.09264
ENSG00000224577.3	LINC01117	-1.09264
ENSG00000185950.9	IRS2	-1.09192
ENSG00000171227.7	TMEM37	-1.09177
ENSG00000134595.9	SOX3	-1.09068
ENSG00000109101.8	FOXN1	-1.09043
ENSG00000240366.1	RPL36AP45	-1.0886
ENSG00000164976.9	MYORG	-1.08646
ENSG00000152284.5	TCF7L1	-1.08445
ENSG00000168769.14	TET2	-1.08324
ENSG00000166289.6	PLEKHF1	-1.0768
ENSG00000172594.13	SMPDL3A	-1.07429
ENSG00000006831.10	ADIPOR2	-1.07396
ENSG00000207217.1	SNORA80D	-1.07341
ENSG00000171621.14	SPSB1	-1.07341
ENSG00000201098.1	RNY1	-1.07325
ENSG00000137203.15	TFAP2A	-1.07138
ENSG00000215482.3	CALM2P3	-1.0693
ENSG00000228043.5	AC114763.1	-1.06762
ENSG00000143878.10	RHOB	-1.06729
ENSG00000153071.15	DAB2	-1.06396
ENSG00000177181.15	RIMKLA	-1.06392
ENSG00000101463.6	SYNDIG1	-1.06337
ENSG00000278771.1	RN7SL3	-1.06153
ENSG00000185745.10	IFIT1	-1.06112
ENSG00000169129.15	AFAP1L2	-1.05225
ENSG00000236824.2	BCYRN1	-1.05199
ENSG00000110375.3	UPK2	-1.0502
ENSG00000151929.10	BAG3	-1.04848
ENSG00000271643.2	AC112220.4	-1.04809
ENSG00000134470.21	IL15RA	-1.04601
ENSG00000235609.7	AF127577.4	-1.04109
ENSG00000141337.13	ARSG	-1.04016
ENSG00000159167.12	STC1	-1.03893
ENSG00000143891.17	GALM	-1.03722
ENSG00000151025.11	GPR158	-1.03616
ENSG00000182552.15	RWDD4	-1.03322
ENSG00000204103.4	MAFB	-1.03322
ENSG00000096968.14	JAK2	-1.03317
ENSG00000176928.7	GCNT4	-1.03223
ENSG00000252947.1	SCARNA1	-1.03174
ENSG00000164867.11	NOS3	-1.03081
ENSG00000151715.8	TMEM45B	-1.02941
ENSG00000113369.9	ARRDC3	-1.02734
ENSG00000171345.13	KRT19	-1.0264
ENSG00000153237.18	CCDC148	-1.0258
ENSG00000272031.3	ANKRD34A	-1.0255
ENSG00000113594.10	LIFR	-1.02519
ENSG00000258057.6	BCDIN3D-AS1	-1.02035
ENSG00000113494.17	PRLR	-1.01969
ENSG00000237172.4	B3GNT9	-1.0193
ENSG00000080298.16	RFX3	-1.01847
ENSG00000168350.8	DEGS2	-1.01641
ENSG00000151690.15	MFSD6	-1.01502
ENSG00000170412.18	GPRC5C	-1.01365
ENSG00000118276.12	B4GALT6	-1.00849
ENSG00000070961.16	ATP2B1	-1.00528
ENSG00000204588.5	LINC01123	-1.00523
ENSG00000198910.14	L1CAM	-1.00372
ENSG00000286381.1		-1.00119
ENSG00000066735.15	KIF26A	-1.00045
