# Supplementary material for: JMJD6 orchestrates a transcriptional program in favor of endocrine resistance in ER+ breast cancer cells
Source: Front Endocrinol (Lausanne). 2022 Nov 7;13:1028616. doi: 10.3389/fendo.2022.1028616 (PMC9678079; doi:10.3389/fendo.2022.1028616)
Supplement: Supplementary Table 3 — List of specific pathway genes and their level of expression in JOE and ESR1 KD datasets. [file Table_3.xlsx]

## Sheet: E2F
Gene	logFC_ESR1 KD	logFC_JOE
AK2	3.89	0.67636
ATAD2	0.663	0.416542
AURKA	-0.484	0.364568
AURKB	1.67	0.679595
BRCA1	-0.296	0.613604
BRCA2	-0.269	0.318039
CCNE1	0.299	0.790943
CDC20	0.945	0.501501
CDC25A	0.725	0.606499
CDCA3	0.724	0.516742
CDKN2A	-0.238	1.41117
CDKN2C	1.23	0.558186
CENPM	0.285	0.665579
CHEK1	0.622	0.433185
DCK	0.283	0.605754
DDX39A	-0.681	0.309955
DEK	0.257	0.279737
DEPDC1	1.51	0.382274
DIAPH3	1.89	0.347726
DLGAP5	1.1	0.356737
DNMT1	0.927	0.446042
DONSON	0.507	0.817888
DSCC1	-0.226	0.633975
E2F8	-0.613	0.655956
EZH2	1.4	0.366202
GINS3	-0.26	0.421135
GINS4	0.409	1.03363
HMGA1	2.09	0.354916
HMGB2	0.499	0.79557
HMMR	-1.72	0.874785
HNRNPD	1.9	0.458671
KIF18B	0.739	0.60479
KIF2C	1.81	0.640105
KIF4A	0.477	0.350247
LBR	1.34	0.997353
LIG1	-0.88	0.664146
LMNB1	-0.378	0.430856
LYAR	0.831	0.605526
MAD2L1	-1.15	0.757139
MCM2	0.311	0.582109
MCM3	0.781	0.451885
MCM4	0.721	0.636091
MCM5	0.45	0.65601
MCM6	-0.413	0.542265
MKI67	0.753	0.286453
MLH1	0.206	0.4363
MTHFD2	0.594	0.298402
MYBL2	-0.386	0.455145
NAA38	-0.448	0.297586
NASP	1.4	0.382958
NCAPD2	1.05	0.534237
ORC6	0.529	0.59399
PCNA	0.267	0.530284
PLK1	-0.714	0.649243
PLK4	-0.409	0.618857
POLD2	0.955	0.29412
POLD3	0.811	0.689364
PRIM2	0.807	0.524722
PSMC3IP	1.66	0.875518
PTTG1	0.546	0.415045
RAD51AP1	1.17	1.04066
RAD51C	-2.93	0.444702
RBBP7	-0.3	0.490335
RFC2	-1.41	0.551191
RFC3	-1.24	0.610099
RPA1	0.474	0.387716
RPA2	1.16	0.35827
RPA3	-0.417	0.350308
RRM2	0.337	0.697315
SMC1A	-0.685	0.542641
SMC4	0.904	0.571024
SPC25	-1.02	0.498831
SSRP1	2.22	0.280076
STMN1	1.29	0.351716
SUV39H1	-1.06	0.401858
TACC3	-0.246	0.463489
TCF19	-0.58	0.654598
TMPO	0.318	0.273624
TOP2A	0.519	0.399502
TP53	-0.834	0.491626
TRIP13	-1.17	0.735394
TUBB	-0.273	0.43842
TUBG1	-0.43	0.275357
UBE2S	0.85	0.563603
UBE2T	-0.518	0.664896

## Sheet: G2M
Gene	logFC_ESR1 KD	logFC_JOE
ABL1	0.558	0.269561
AURKA	-0.484	0.364568
AURKB	1.67	0.679595
BRCA2	-0.269	0.318039
BUB1	1.19	0.600516
CCNA2	-0.305	0.614659
CDC20	0.945	0.501501
CDC25A	0.725	0.606499
CDC45	0.242	0.916493
CDC6	0.475	0.948343
CDKN2C	1.23	0.558186
CENPA	-0.393	0.472919
CHAF1A	1.01	0.697039
CHEK1	0.622	0.433185
CHMP1A	-0.561	0.320868
DBF4	-0.376	0.322554
DDX39A	-0.681	0.309955
E2F1	0.993	0.593056
E2F4	-0.333	0.348742
EZH2	1.4	0.366202
FBXO5	0.415	0.547745
GINS2	-0.682	0.903207
HMGA1	2.09	0.354916
HMMR	-1.72	0.874785
HNRNPD	1.9	0.458671
HNRNPU	2.61	0.549912
INCENP	0.855	0.600956
KIF11	0.771	0.355946
KIF15	0.954	0.514334
KIF20B	1.18	0.444866
KIF23	1.22	0.428785
KIF2C	1.81	0.640105
KIF4A	0.477	0.350247
LBR	1.34	0.997353
LMNB1	-0.378	0.430856
MAD2L1	-1.15	0.757139
MCM2	0.311	0.582109
MCM3	0.781	0.451885
MCM5	0.45	0.65601
MCM6	-0.413	0.542265
MEIS1	0.68	1.67905
MEIS2	-0.23	0.554487
MKI67	0.753	0.286453
MT2A	1.9	1.02597
MYBL2	-0.386	0.455145
NASP	1.4	0.382958
NDC80	0.428	0.48718
NEK2	0.649	1.00744
NUP50	0.799	0.323995
ORC6	0.529	0.59399
PLK1	-0.714	0.649243
PLK4	-0.409	0.618857
POLQ	-0.584	0.449527
PRIM2	0.807	0.524722
PTTG1	0.546	0.415045
RAD54L	0.595	0.451302
RBL1	2.21	0.691992
RPA2	1.16	0.35827
SAP30	0.464	0.759436
SMC1A	-0.685	0.542641
SMC2	-0.255	0.795048
SMC4	0.904	0.571024
SNRPD1	0.799	0.313241
STIL	0.759	0.316634
STMN1	1.29	0.351716
SUV39H1	-1.06	0.401858
TACC3	-0.246	0.463489
TMPO	0.318	0.273624
TOP2A	0.519	0.399502
TPX2	0.543	0.360925
TRAIP	0.503	0.599472
TTK	0.27	0.811587
UBE2S	0.85	0.563603

## Sheet: Mitotic Spindle
Gene	logFC_ESR1 KD	logFC_JOE
ABL1	0.558	0.269561
ABR	1.68	0.301469
ANLN	1.68	0.545996
ARAP3	3.28	1.93251
ARHGEF3	0.83	0.506179
ARL8A	-0.887	0.466742
AURKA	-0.484	0.364568
BRCA2	-0.269	0.318039
BUB1	1.19	0.600516
CDC42EP1	0.683	0.96184
CEP131	0.299	0.346989
CEP57	1.61	0.530962
CKAP5	0.941	0.266327
CNTROB	0.583	0.325766
DLGAP5	1.1	0.356737
EPB41L2	1.55	0.295194
FBXO5	0.415	0.547745
FSCN1	0.747	0.521554
GEMIN4	0.296	0.305829
HOOK3	2.28	0.865044
INCENP	0.855	0.600956
KIF11	0.771	0.355946
KIF15	0.954	0.514334
KIF20B	1.18	0.444866
KIF23	1.22	0.428785
KIF2C	1.81	0.640105
KIF4A	0.477	0.350247
KNTC1	0.511	0.60733
LMNB1	-0.378	0.430856
MYO1E	0.72	0.411482
NDC80	0.428	0.48718
NEDD9	-5.64	0.816125
NEK2	0.649	1.00744
NET1	-1.06	0.69288
PLEKHG2	0.388	0.917651
PLK1	-0.714	0.649243
SAC3D1	-0.557	0.595925
SASS6	0.692	0.669793
SHROOM1	-0.313	0.911532
SMC1A	-0.685	0.542641
SMC4	0.904	0.571024
TAOK2	-1	0.415673
TOP2A	0.519	0.399502
TPX2	0.543	0.360925
TTK	0.27	0.811587
TUBA4A	2.55	1.2537
